# Supplementary material
Source: PubMed Central journal article supplement (PMC2976280)
Supplement: supp_dev.055970_DEV055970TableS1.pdf [file supp_dev.055970_DEV055970TableS1.pdf]

**Table S1. Primer sequences (5' to 3') for RT-PCR**

| Gene         | Forward               | Reverse               |
|--------------|-----------------------|-----------------------|
| <i>Krt14</i> | AGAGGACGCCACCTTTC     | TTAGTTCTTGGTGCGCAG    |
| <i>Gapdh</i> | AGTATGATGACATCAAGAAGG | ATGGTATTCAAGAGAGTAGGG |
| <i>Ctgf</i>  | CACAGCAGTTGGCCCTGC    | ATGCACTTTTTGCCCTTCTTA |
| <i>Foxc1</i> | TCACCTCGTGGTACCTGAAC  | TGCGGTACAGAGACTGACTG  |
| <i>Fzd7</i>  | TTCTCGGACGATGGCTAC    | TTCATGATGGTGCGGAT     |
