# Supplementary material
Source: PubMed Central journal article supplement (PMC2976280)

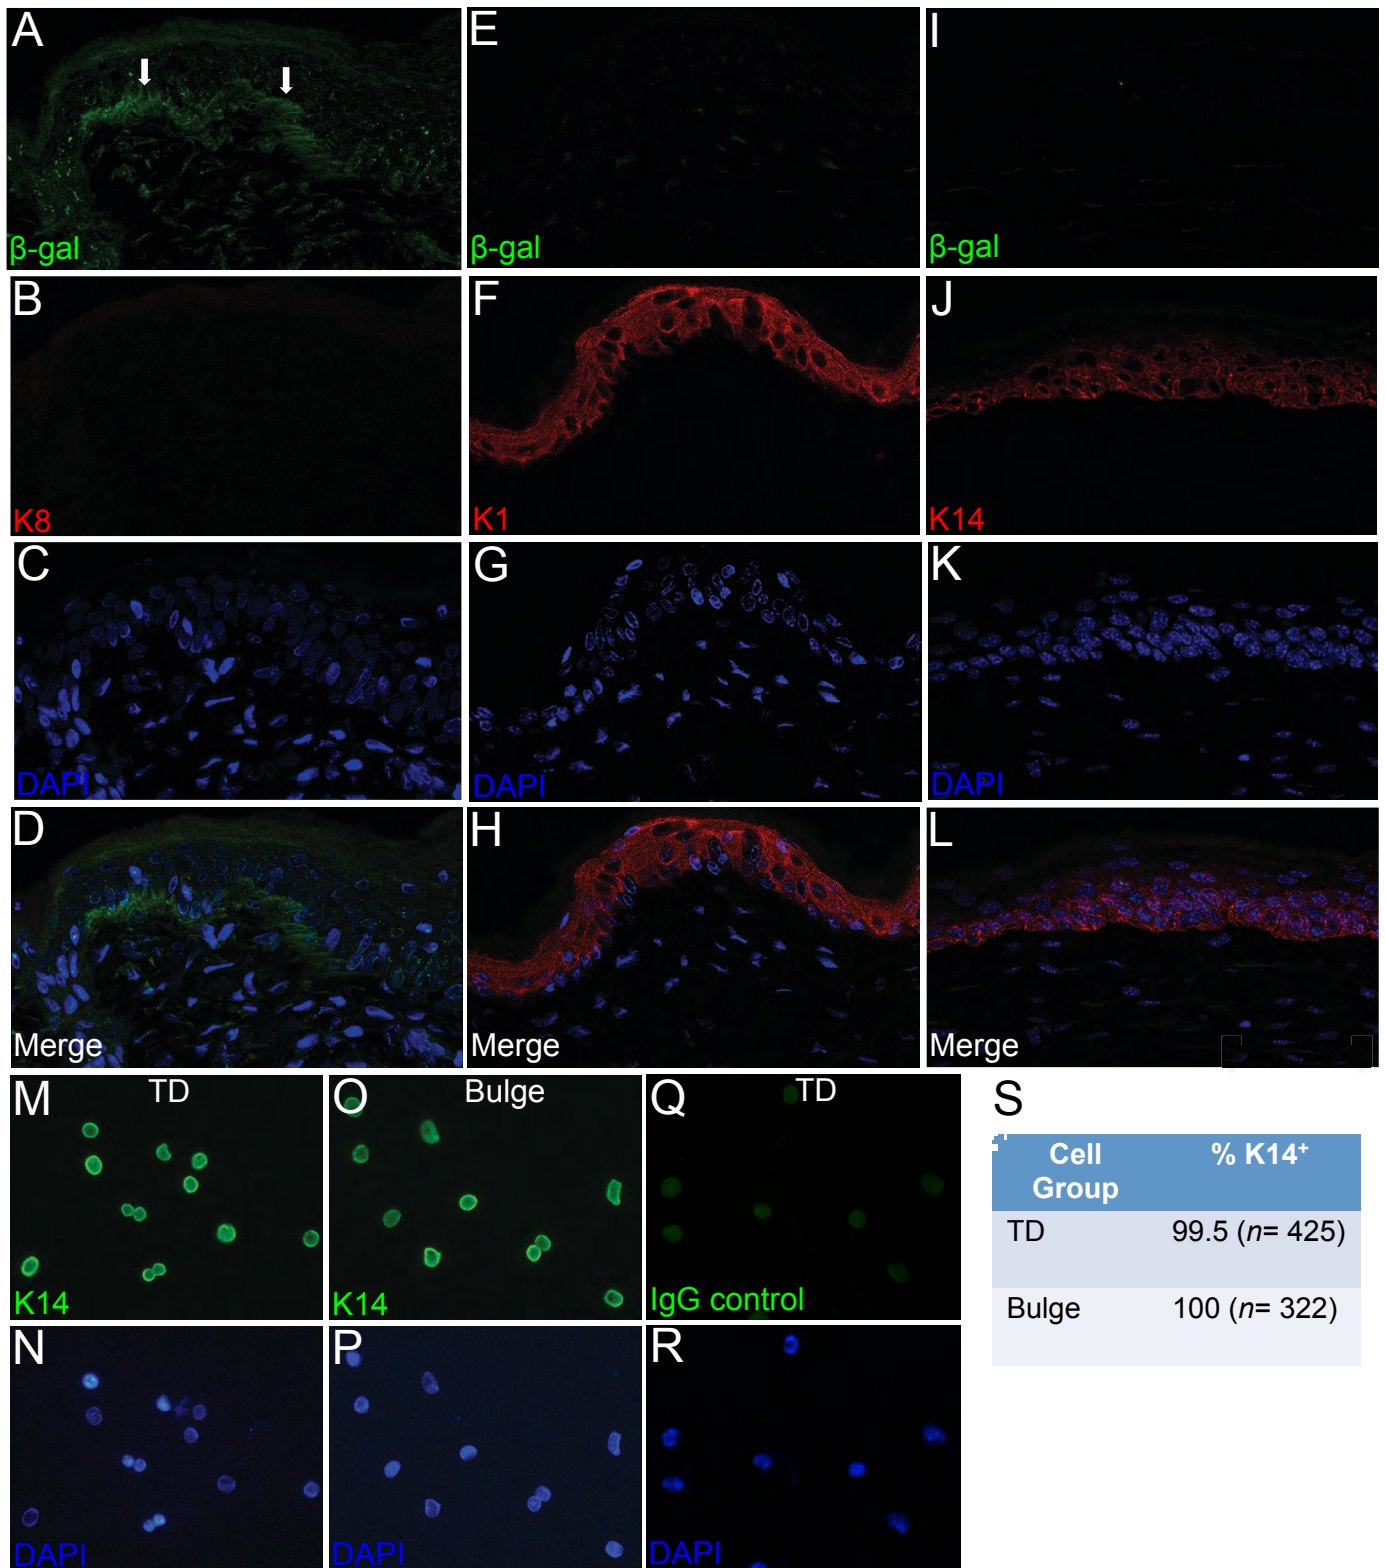

Supplement: supp_dev.055970_DEV055970FigS2.pdf [file supp_dev.055970_DEV055970FigS2.pdf]
